# Supplementary material for: A VNTR Regulates miR-137 Expression Through Novel Alternative Splicing and Contributes to Risk for Schizophrenia
Source: PubMed Central journal article supplement (PMC6692358; doi:10.1038/s41598-019-48141-0), 2019-08-13
Supplement: 41598_2019_48141_MOESM1_ESM.pdf [file 41598_2019_48141_MOESM1_ESM.pdf]

# A VNTR Regulates miR-137 Expression Through Novel Alternative Splicing and Contributes to Risk for Schizophrenia

Ashley Pacheco<sup>1</sup>, Ralph Berger<sup>1</sup>, Robert Freedman<sup>1</sup>, Amanda J. Law<sup>1,2,3\*</sup>

From the Departments of Psychiatry<sup>1</sup>, Medicine<sup>2</sup> and Cell and Developmental Biology<sup>3</sup>, University of Colorado, School of Medicine, Aurora, Colorado 80045.

\*To whom correspondence should be addressed: Prof. Amanda J. Law, Department of Psychiatry, University of Colorado, School of Medicine, 12700 East 19th Avenue, Mailstop 8619, RC2, RM 4100C, Aurora, Colorado 80045, Telephone: (303) 724-4418; Fax: (303) 724-4425; amanda.law@ucdenver.edu

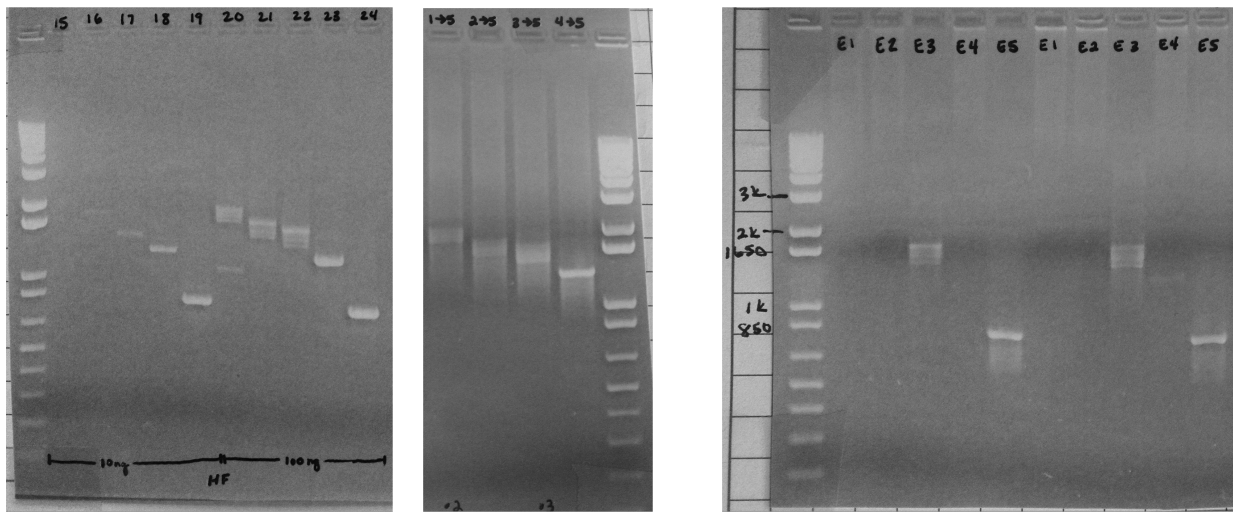

**Supplementary Figure S1.** Full length PCR gels for custom primer pairs are shown to supplement manuscript Figure 1. The lefthand gel is the result of miR-137 custom primers in adult total brain cDNA as seen in Figure 1a. The center gel is the result of miR-137 custom primers in fetal total brain cDNA as seen in Figure 1a. In the righthand gel lane 3 is the primer pair exon 3 to 5 in adult total brain cDNA and lane 8 is the same primer pair in fetal total brain cDNA as seen in Figure 1b.

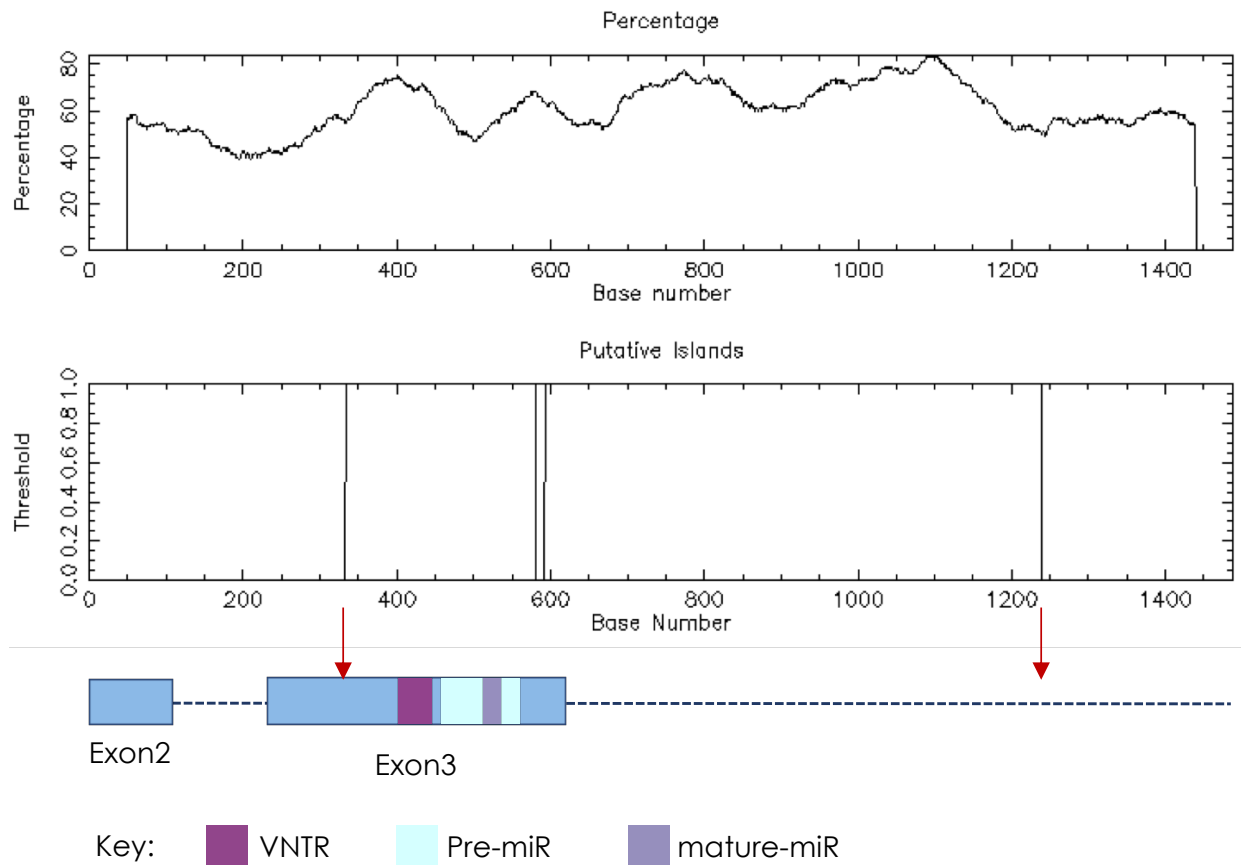

**Supplementary Figure S2.** EMBOSS CpG island prediction output. The top box displays the percentage of C or G nucleotides across the genome region. The bottom box displays the bounds of predicted CpG islands. Red arrows point to corresponding *MIR137HG* genome location. The CpG islands span the majority of pri-miR-137 exon 3 including the VNTR, pre- and mature miR sequences and continues into intron 3. Increased VNTR repeats would extend the length of the associated CpG island.

| Target Rank | Target Score | miRNA Name        |
|-------------|--------------|-------------------|
| 1           | 85           | hsa-miR-3123      |
| 2           | 82           | hsa-miR-3145-5p   |
| 3           | 81           | hsa-miR-4778-3p   |
| 4           | 79           | hsa-miR-6806-5p   |
| 5           | 75           | hsa-miR-526a*     |
| 6           | 75           | hsa-miR-523-5p    |
| 7           | 75           | hsa-miR-522-5p    |
| 8           | 75           | hsa-miR-520c-5p*  |
| 9           | 75           | hsa-miR-519c-5p*  |
| 10          | 75           | hsa-miR-519b-5p*  |
| 11          | 75           | hsa-miR-519a-5p   |
| 12          | 75           | hsa-miR-518f-5p   |
| 13          | 75           | hsa-miR-518e-5p   |
| 14          | 75           | hsa-miR-518d-5p*  |
| 15          | 75           | hsa-miR-4277      |
| 16          | 72           | hsa-miR-550a-5p*  |
| 17          | 72           | hsa-miR-550a-3-5p |
| 18          | 72           | hsa-miR-7109-5p   |
| 19          | 71           | hsa-miR-634*      |
| 20          | 70           | hsa-miR-4257      |
| 21          | 70           | hsa-miR-6742-5p   |
| 22          | 69           | hsa-miR-650*      |
| 23          | 69           | hsa-miR-3612      |
| 24          | 66           | hsa-miR-378g      |
| 25          | 66           | hsa-miR-944*      |
| 26          | 64           | hsa-miR-802*      |
| 27          | 64           | hsa-miR-4427      |
| 28          | 63           | hsa-miR-1285-5p   |
| 29          | 62           | hsa-miR-7852-3p   |
| 30          | 62           | hsa-miR-3180-5p   |
| 31          | 61           | hsa-miR-4762-5p   |
| 32          | 59           | hsa-miR-651-3p    |
| 33          | 58           | hsa-miR-4446-5p   |
| 34          | 58           | hsa-miR-4443      |
| 35          | 57           | hsa-miR-4251      |
| 36          | 57           | hsa-miR-4639-5p   |
| 37          | 56           | hsa-miR-4263      |
| 38          | 56           | hsa-miR-519e-3p   |
| 39          | 56           | hsa-miR-515-3p    |
| 40          | 56           | hsa-miR-33b-3p    |
| 41          | 55           | hsa-miR-491-5p    |
| 42          | 55           | hsa-miR-6777-3p   |
| 43          | 55           | hsa-miR-4457      |
| 44          | 54           | hsa-miR-509-5p    |
| 45          | 54           | hsa-miR-509-3-5p  |
| 46          | 54           | hsa-miR-4418      |
| 47          | 53           | hsa-miR-455-3p    |
| 48          | 53           | hsa-miR-4758-3p   |
| 49          | 52           | hsa-miR-3168      |
| 50          | 52           | hsa-miR-7515      |
| 51          | 52           | hsa-miR-186-5p    |
| 52          | 51           | hsa-miR-3667-3p   |
| 53          | 50           | hsa-miR-519d-5p   |
| 54          | 50           | hsa-miR-8063      |
| 55          | 50           | hsa-miR-4743-3p   |
| 56          | 50           | hsa-miR-1296-3p   |

\*validated miRs in the axon guidance pathway

**Supplementary Table S1.** Del-miR-137 Predicted Binding miRNAs predicted using miRDB.org, Wong and Wang (2015)

| Target Gene | Gene Description                                                                       |
|-------------|----------------------------------------------------------------------------------------|
| ANK2        | ankyrin 2 neuronal                                                                     |
| ARHGEF12    | Rho guanine nucleotide exchange factor (GEF) 12                                        |
| CACNB4      | calcium channel voltage-dependent beta 4 subunit                                       |
| CLASP2      | cytoplasmic linker associated protein 2                                                |
| CNTNAP1     | contactin associated protein 1                                                         |
| COL1A1      | collagen type I alpha 1                                                                |
| COL4A4      | collagen type IV alpha 4                                                               |
| COL5A1      | collagen type V alpha 1                                                                |
| COL5A2      | collagen type V alpha 2                                                                |
| CREB1       | cAMP responsive element binding protein 1                                              |
| CRMP1       | collapsin response mediator protein 1                                                  |
| DCX         | doublecortin                                                                           |
| DPYSL2      | dihydropyrimidinase-like 2                                                             |
| DPYSL5      | dihydropyrimidinase-like 5                                                             |
| ENAH        | enabled homolog (Drosophila)                                                           |
| FGFR1       | fibroblast growth factor receptor 1                                                    |
| ITGAV       | integrin alpha V                                                                       |
| KIAA1598    | Shootin-1                                                                              |
| MYO10       | myosin X                                                                               |
| NRAS        | neuroblastoma RAS viral (v-ras) oncogene homolog                                       |
| NRCAM       | neuronal cell adhesion molecule                                                        |
| NRP1        | neuropilin 1                                                                           |
| NTN4        | netrin 4                                                                               |
| PAK2        | p21 protein (Cdc42/Rac)-activated kinase 2                                             |
| PAK7        | p21 protein (Cdc42/Rac)-activated kinase 7                                             |
| PFN2        | profilin 2                                                                             |
| RAC1        | ras-related C3 botulinum toxin substrate 1 (rho family small GTP binding protein Rac1) |
| ROBO1       | roundabout axon guidance receptor homolog 1 (Drosophila)                               |
| ROBO2       | roundabout axon guidance receptor homolog 2 (Drosophila)                               |
| RPS6KA1     | ribosomal protein S6 kinase, 90kDa, polypeptide 1                                      |
| RPS6KA3     | ribosomal protein S6 kinase, 90kDa, polypeptide 3                                      |
| SCN1A       | sodium channel, voltage-gated, type I, alpha subunit                                   |
| SCN3A       | sodium channel, voltage-gated, type III, alpha subunit                                 |
| SEMA3A      | sema domain, immunoglobulin domain (Ig), short basic domain, secreted, (semaphorin) 3A |
| SEMA6A      | sema domain, transmembrane domain (TM), and cytoplasmic domain, (semaphorin) 6A        |
| SEMA6D      | sema domain, transmembrane domain (TM), and cytoplasmic domain, (semaphorin) 6D        |
| SIAH1       | siah E3 ubiquitin protein ligase 1                                                     |
| SPTBN1      | spectrin, beta, non-erythrocytic 1                                                     |
| SRGAP3      | SLIT-ROBO Rho GTPase activating protein 3                                              |
| ST8SIA2     | ST8 alpha-N-acetylneuraminide alpha-2, 8-sialyltransferase 2                           |
| ST8SIA4     | ST8 alpha-N-acetylneuraminide alpha-2, 8-sialyltransferase 4                           |
| TRPC3       | transient receptor potential cation channel, subfamily C, member 3                     |
| TRPC5       | transient receptor potential cation channel, subfamily C, member 5                     |
| UNC5D       | unc-5 homolog D (C. elegans)                                                           |
| WASL        | Wiskott-Aldrich syndrome-like                                                          |

**Supplementary Table S2.** Target genes for the Del-miR binding miRs found in the ‘Axon Guidance’ pathway. Predicted by miRSystem (Tzu-Pin Lu et. al., 2012).

| Allele   | Controls(n=306) |          | Combined<br>AOS/COS (n=678) |          | AOS(n=590) |          | COS(n=88) |          |
|----------|-----------------|----------|-----------------------------|----------|------------|----------|-----------|----------|
|          | n               | Freq.(%) | n                           | Freq.(%) | n          | Freq.(%) | n         | Freq.(%) |
| 3        | 417             | 68.1     | 980                         | 72.3     | 849        | 71.9     | 131       | 74.4     |
| 4        | 71              | 11.6     | 121                         | 8.9      | 103        | 8.7      | 18        | 10.2     |
| 5        | 30              | 4.9      | 65                          | 4.8      | 61         | 5.2      | 4         | 2.3      |
| 6        | 16              | 2.6      | 44                          | 3.2      | 42         | 3.6      | 2         | 1.1      |
| 7        | 21              | 3.4      | 39                          | 2.9      | 34         | 2.9      | 5         | 2.8      |
| 8        | 19              | 3.1      | 30                          | 2.2      | 23         | 1.9      | 7         | 4.0      |
| 9        | 13              | 2.1      | 30                          | 2.2      | 24         | 2.0      | 6         | 3.4      |
| 10       | 11              | 1.8      | 28                          | 2.1      | 25         | 2.1      | 3         | 1.7      |
| 11       | 10              | 1.6      | 10                          | 0.7      | 10         | 0.8      | -         | -        |
| 12       | 1               | 0.2      | 7                           | 0.5      | 7          | 0.6      | -         | -        |
| 13       | 3               | 0.5      | -                           | -        | -          | -        | -         | -        |
| 14       | -               | -        | 2                           | 0.1      | 2          | 0.2      | -         | -        |
| Total    | 612             |          | 1356                        |          | 1180       |          | 176       |          |
| Genotype | n               | Freq.    | n                           | Freq.    | n          | Freq.    | n         | Freq.    |
| 3/3      | 143             | 46.7     | 346                         | 51.0     | 297        | 50.3     | 49        | 55.7     |
| 3/>3     | 131             | 42.8     | 288                         | 42.5     | 255        | 43.2     | 33        | 37.5     |
| >3/>3    | 32              | 10.5     | 44                          | 6.5      | 38         | 6.4      | 6         | 6.8      |
| Genotype | n               | Freq.    | n                           | Freq.    | n          | Freq.    | n         | Freq.    |
| 3/3      | 143             | 46.7     | 346                         | 51.0     | 297        | 50.3     | 49        | 55.7     |
| 3/4      | 50              | 16.3     | 91                          | 13.4     | 78         | 13.2     | 13        | 14.8     |
| 3/5      | 19              | 6.2      | 45                          | 6.6      | 44         | 7.5      | 1         | 1.1      |
| 3/6      | 8               | 2.6      | 31                          | 4.6      | 30         | 5.1      | 1         | 1.1      |
| 3/7      | 19              | 6.2      | 30                          | 4.4      | 26         | 4.4      | 4         | 4.5      |
| 3/8      | 11              | 3.6      | 24                          | 3.5      | 18         | 3.1      | 6         | 6.8      |
| 3/9      | 8               | 2.6      | 25                          | 3.7      | 20         | 3.4      | 5         | 5.7      |
| 3/10     | 10              | 3.3      | 24                          | 3.5      | 21         | 3.6      | 3         | 3.4      |
| 3/11     | 4               | 1.3      | 9                           | 1.3      | 9          | 1.5      | -         | -        |
| 3/12     | 1               | 0.3      | 7                           | 1.0      | 7          | 1.2      | -         | -        |
| 3/13     | 1               | 0.3      | -                           | -        | -          | -        | -         | -        |
| 3/14     | -               | -        | 2                           | 0.3      | 2          | 0.3      | -         | -        |
| 4/4      | 1               | 0.3      | 6                           | 0.9      | 4          | 0.7      | 2         | 2.3      |
| 4/5      | 4               | 1.3      | 4                           | 0.6      | 3          | 0.5      | 1         | 1.1      |
| 4/6      | 3               | 1.0      | 4                           | 0.6      | 4          | 0.7      | -         | -        |
| 4/7      | -               | -        | 4                           | 0.6      | 4          | 0.7      | -         | -        |
| 4/8      | 3               | 1.0      | 3                           | 0.4      | 3          | 0.5      | -         | -        |
| 4/9      | 4               | 1.3      | 1                           | 0.1      | 1          | 0.2      | -         | -        |
| 4/10     | -               | -        | 2                           | 0.3      | 2          | 0.3      | -         | -        |
| 4/11     | 4               | 1.3      | -                           | -        | -          | -        | -         | -        |
| 4/13     | 1               | 0.3      | -                           | -        | -          | -        | -         | -        |
| 5/5      | 2               | 0.7      | 2                           | 0.3      | 2          | 0.3      | -         | -        |
| 5/6      | 1               | 0.3      | 4                           | 0.6      | 4          | 0.7      | -         | -        |
| 5/7      | -               | -        | 3                           | 0.4      | 3          | 0.5      | -         | -        |
| 5/8      | 1               | 0.3      | 3                           | 0.4      | 2          | 0.3      | 1         | 1.1      |
| 5/9      | -               | -        | 1                           | 0.1      | -          | -        | 1         | 1.1      |
| 5/10     | -               | -        | 1                           | 0.1      | 1          | 0.2      | -         | -        |
| 5/13     | 1               | 0.3      | -                           | -        | -          | -        | -         | -        |
| 6/6      | 1               | 0.3      | 1                           | 0.1      | 1          | 0.2      | -         | -        |
| 6/7      | 1               | 0.3      | 1                           | 0.1      | -          | -        | 1         | 1.1      |
| 6/9      | 1               | 0.3      | -                           | -        | -          | -        | -         | -        |
| 6/10     | -               | -        | 1                           | 0.1      | 1          | 0.2      | -         | -        |
| 6/11     | -               | -        | 1                           | 0.1      | 1          | 0.2      | -         | -        |
| 7/9      | -               | -        | 1                           | 0.1      | 1          | 0.2      | -         | -        |
| 7/11     | 1               | 0.3      | -                           | -        | -          | -        | -         | -        |
| 8/8      | 1               | 0.3      | -                           | -        | -          | -        | -         | -        |
| 8/10     | 1               | 0.3      | -                           | -        | -          | -        | -         | -        |
| 8/11     | 1               | 0.3      | -                           | -        | -          | -        | -         | -        |
| 9/9      | -               | -        | 1                           | 0.1      | 1          | 0.2      | -         | -        |

- Dashes indicate variants not found in the diagnostic group

**Supplementary Table S3.** VNTR allele and genotype results for all subjects.
